# Supplementary material for: Recent Advances in Developing Treatments of Kaposi’s Sarcoma Herpesvirus-Related Diseases
Source: MDPI journal article supplement (doi:10.3390/v13091797), 2021-09-09
Supplement: s1 [file s1]

| Therapies in clinical trials |                                                                                                   |
|------------------------------|---------------------------------------------------------------------------------------------------|
| Compound                     | References                                                                                        |
| Cidofovir                    | (Kedes and Ganem 1997)(Medveczky et al. 1997)(Neyts and De Clercq 1997)(Sergerie and Boivin 2003) |
| Ganciclovir                  | (Kedes and Ganem 1997)(Medveczky et al. 1997)(Neyts and De Clercq 1997)(Sergerie and Boivin 2003) |
| Foscarnet                    | (Kedes and Ganem 1997)(Medveczky et al. 1997)(Neyts and De Clercq 1997)(Sergerie and Boivin 2003) |
| Brivudine                    | (Beauclair et al. 2020)(Coen et al. 2014)                                                         |
| Adefovir                     | (Coen et al. 2014)                                                                                |
| Imatinib                     | (Koon et al. 2005)(Koon et al. 2014)                                                              |
| Sorafenib                    | (Ardavanis et al. 2008) (Uldrick et al. 2017)                                                     |
| Rapamycin/Sirolimus          | (Krown et al. 2012)(Sodhi et al. 2006) (Roy et al. 2013)(Sin et al. 2007)(Bhatt et al. 2010)      |
| Bortezomib                   | (Granato et al. 2017)(Matta and Chaudhary 2005)(Sarosiek et al. 2010) (Reid et al. 2020)          |
| Rituximab                    | (Uldrick et al. 2014)(Lurain et al. 2019)                                                         |
| Bevacizumab                  | (Uldrick et al. 2012)(Ablanedo-Terrazas et al. 2015)                                              |
| Siltuximab                   | (van Rhee, Greenway, and Stone 2018)<br>(Ramaswami et al. 2019)                                   |
| Tolicizumab                  | (Ramaswami et al. 2020) (Nagao, Nakazawa, and Hanabusa 2014)(Aita et al. 2020)                    |
| Pomalidomide                 | (Polizzotto et al. 2016)                                                                          |
